# Supplementary material for: Monocytes prevent apoptosis of iPSCs and promote differentiation of kidney organoids
Source: PubMed Central journal article supplement (PMC11069262; doi:10.1186/s13287-024-03739-8), 2024-05-03
Supplement: 13287_2024_3739_MOESM2_ESM.pdf [file 13287_2024_3739_MOESM2_ESM.pdf]

SCRT-D-23-01518

**Supplementary Table 1. List of reagents and antibodies used in the study.**

| Reagent                             | Vendor                               | Catalog #    |
|-------------------------------------|--------------------------------------|--------------|
| <b>Cell culture</b>                 |                                      |              |
| Human Episomal iPSC Line            | Gibco by ThermoFisher                | A18945       |
| ED- iPSC cell line                  | CEA, Institute Joliot, Paris, France |              |
| StemFlex                            | Gibco by ThermoFisher                | A3349401     |
| DPBS                                | Gibco by ThermoFisher                | 14190144     |
| StemPro Accutase                    | Gibco by ThermoFisher                | A1110501     |
| DMEM/F12                            | Gibco by ThermoFisher                | 11320033     |
| Cell culture plates                 | CELLSTAR                             | 657160       |
| Geltrex                             | Gibco by ThermoFisher                | A1413302     |
| Y-27632 2HCl ROCK inhibitor         | Selleckchem                          | S1049        |
| Laduviglusib (CHIR-99021) HCl       | Selleckchem                          | S2924        |
| Rapamycin                           | Selleckchem                          | S1039        |
| Advanced RPMI 1640 medium           | PAN-Biotech                          | P04-16500    |
| Fetal Bovine Serum                  | PAN-Biotech                          | P30-3306     |
| Cell culture flasks                 | SARSTEDT                             | 83.3911.002  |
| Classical Monocyte Isolation Kit    | Miltenyi Biotec                      | 130-117-337  |
| Lymphocytes-Separation Medium 1077  | PromoCell                            | C-44010      |
| Leucosep tubes                      | Greiner CELLSTAR by Merck            | 227290       |
| Human Activin A Recombinant Protein | PeproTech by ThermoFisher            | 120-14E-10UG |
| L-Glutamine                         | PAN-Biotech                          | P04-80100    |
| KnockOut Serum Replacement          | Gibco by ThermoFisher                | 10828028     |
| Recombinant Human Noggin            | PeproTech by ThermoFisher            | 120-10C      |

|                                                           |                                       |                  |
|-----------------------------------------------------------|---------------------------------------|------------------|
| Human Activin A Recombinant Protein                       | PeproTech by ThermoFisher             | 120-14E          |
| Recombinant Human FGF-9 Protein                           | R&D Systems, Inc., a Bio-Techne Brand | 273-F9-025       |
| Human recombinant M-SCF                                   | PeproTech by ThermoFisher             | 300-25           |
| Human recombinant IL-4                                    | PeproTech by ThermoFisher             | 200-04           |
| LPS                                                       | Sigma                                 | L2887            |
| Human recombinant IFN $\gamma$                            | PeproTech by ThermoFisher             | 300-02           |
| Transparent Thincert cell culture inserts                 | Greiner Bio-One                       | 657641 or 662641 |
| Nunc 96-Well Optical Coverglass Bottom plate              | Revvity                               | 6005182          |
| ethanol                                                   | J.T.Baker by Avantor                  | 8025             |
| <b>RT-PCR</b>                                             |                                       |                  |
| The Qiagen RNeasy Mini Kit                                | Qiagen                                | 74106            |
| $\beta$ -mercaptoethanol                                  | Sigma-Aldrich by Merck                | M3148            |
| Pax2                                                      | ThermoFisher Scientific               | HS01057416_m1    |
| Gata 3                                                    | ThermoFisher Scientific               | HS00231122_m1    |
| Nephrin                                                   | ThermoFisher Scientific               | HS00190446_m1    |
| Cdh1                                                      | ThermoFisher Scientific               | OS01023895_m1    |
| PDGFR $\beta$                                             | ThermoFisher Scientific               | HA01019589_m1    |
| TBX6                                                      | ThermoFisher Scientific               | Hs00365539_m1    |
| OSR1                                                      | ThermoFisher Scientific               | Hs00377071_m1    |
| IL-6                                                      | ThermoFisher Scientific               | Hs00985639_m1    |
| IL-10                                                     | ThermoFisher Scientific               | Hs00961622_m1    |
| TNF $\alpha$                                              | ThermoFisher Scientific               | Hs00174128_m1    |
| GUSB                                                      | ThermoFisher Scientific               | HS00939627_m1    |
| LightCycler <sup>®</sup> 480 RNA Master Hydrolysis Probes | Roche                                 | 04991885001      |
| <b>Assays and kits</b>                                    |                                       |                  |

|                                                                               |                           |                |
|-------------------------------------------------------------------------------|---------------------------|----------------|
| Autophagy CYTO-ID Autophagy detection kit                                     | Enzo                      | ENZ-51031-0050 |
| Cell Counting Kit-8                                                           | Dojindo                   | CK04-13        |
| BioTracker 488 Green Mitochondria Dye                                         | Millipore by ThermoFisher | SCT136         |
| 5- (und 6-)Carboxy-2',7'-Dichlordihydrofluorescein-Diacetat (Carboxy-H2DCFDA) | ThermoFisher              | C400           |
| CellRox green reagent                                                         | ThermoFisher              | C10444         |
| MitoSOx green reagent                                                         | ThermoFisher              | M36006         |
| <b>Reagents</b>                                                               |                           |                |
| Albumin, Human, Fraktion V, pH 7,0                                            | SERVA                     | 11930.04       |
| Paraformaldehyd                                                               | SERVA                     | 31628          |
| Goat serum                                                                    | Sigma-Aldrich by Merck    | G9023          |
| Donkey serum                                                                  | Sigma-Aldrich by Merck    | D9663          |
| Sodium orthovanadate                                                          | Sigma-Aldrich by Merck    | S6508          |
| Tween 20                                                                      | Carl Roth                 | 9127.1         |
| Triton™ X-100                                                                 | Sigma-Aldrich by Merck    | 9002-93-1      |
| Glycine                                                                       | Carl Roth                 | 3187.4         |
| SDS pellets                                                                   | Carl Roth                 | 8029.4         |
| Methanol                                                                      | J.T.Baker by Avantor      | 67-56-1        |
| PVDF Western Blotting Membranes                                               | Sigma-Aldrich by Merck    | 03010040001    |
| Phenylmethylsulfonylfluorid                                                   | Carl Roth                 | 6367.1         |
| TRIS Hydrochlorid                                                             | Carl Roth                 | 9090.2         |
| Natriumchlorid                                                                | Carl Roth                 | 0601.2         |
| Crystal Violet                                                                | Sigma-Aldrich by Merck    | 548-62-9       |
| Ethylenediaminetetraacetic acid disodium salt dihydrate                       | Sigma-Aldrich by Merck    | 6381-92-6      |
| Sodium deoxycholate                                                           | Sigma-Aldrich by Merck    | 302-95-4       |
| Leupeptin trifluoroacetate salt                                               | Sigma-Aldrich by Merck    | 147385-61-3    |

|                                                                                           |                           |            |
|-------------------------------------------------------------------------------------------|---------------------------|------------|
| Aprotinin from bovine lung                                                                | Sigma-Aldrich by Merck    | 9087-70-1  |
| <b>Antibody</b>                                                                           |                           |            |
| Cleaved Caspase-3 (Asp175) (5A1E)<br>Rabbit mAb                                           | Cell Signaling Technology | 9664       |
| PARP Antibody                                                                             | Cell Signaling Technology | 9542       |
| SQSTM1/p62 Antibody (D-3)                                                                 | Santa Cruz Biotechnology  | sc-28359   |
| GAPDH Antibody (6C5)                                                                      | Santa Cruz Biotechnology  | sc-32233   |
| HSP90AB1                                                                                  |                           |            |
| HSP70                                                                                     |                           |            |
| Calnexin                                                                                  |                           |            |
| Actin                                                                                     |                           |            |
| Nephrin                                                                                   | R&D Systems               | AB_2154851 |
| E-Cadherin                                                                                | Abcam                     | Ab11512    |
| Donkey anti-Sheep IgG (H+L) Cross-Adsorbed Secondary Antibody, Alexa Fluor™ 488           | ThermoFisher              | A-11015    |
| Goat anti-Mouse IgG (H+L) Highly Cross-Adsorbed Secondary Antibody, Alexa Fluor™ Plus 647 | ThermoFisher              | A32728     |
| Anti Mouse IgG HRP-linked                                                                 | Cell Signaling            | 7076S      |
| Anti Rabbit IgG HRP-linked                                                                | Cell Signaling            | 7074S      |
| Anti Goat IgG HRP-coated                                                                  | R&D Systems               | HAF109     |
| DAPI (4',6-Diamidino-2-Phenylindole, Dihydrochloride)                                     | ThermoFisher              | D1306      |
