# Supplementary material for: Monocytes prevent apoptosis of iPSCs and promote differentiation of kidney organoids
Source: PubMed Central journal article supplement (PMC11069262; doi:10.1186/s13287-024-03739-8), 2024-05-03
Supplement: 13287_2024_3739_MOESM3_ESM.pdf [file 13287_2024_3739_MOESM3_ESM.pdf]

**Analytical Report:  
Cell Line Authentication Test  
Order ID: 11108795952**

**Method:**

DNA isolation was carried out from cell pellet (cell layer).

Genetic characteristics were determined by PCR-single-locus-technology.

16 independent PCR-systems D8S1179, D21S11, D7S820, CSF1PO, D3S1358, TH01, D13S317, D16S539, D2S1338, AMEL, D5S818, FGA, D19S433, vWA, TPOX and D18S51 were investigated.

(ASN-0002 core markers are colored grey, Thermo Fisher, AmpFISTR® Identifier® Plus PCR Amplification Kit)

In parallel, positive and negative controls were carried out yielding correct results.

Method details are given in **SOP\_APG\_Zelllinienauthentizität\_2.0**

**Result:**

| Client Sample Name | ED-IPSC 1  | EPI-IPSC1  |
|--------------------|------------|------------|
| <b>Sample Code</b> | CL00016893 | CL00016894 |
| D8S1179            | 13,13      | 9,15       |
| D21S11             | 30,33,2    | 29,29      |
| D7S820             | 9,11       | 10,12      |
| CSF1PO             | 9,12       | 11,11      |
| D3S1358            | 16,17      | 15,18      |
| TH01               | 6,9        | 9,9,3      |
| D13S317            | 10,11      | 9,11       |
| D16S539            | 12,13      | 11,13      |
| D2S1338            | 20,21      | 17,24      |
| D19S433            | 13,13      | 12,14      |
| vWA                | 17,18      | 17,18      |
| TPOX               | 8,9        | 8,8        |
| D18S51             | 12,16      | 15,15      |
| AMEL               | X,X        | X,X        |
| D5S818             | 10,11      | 11,12      |
| FGA                | 22,23      | 22,25      |

The laboratory is accredited acc. to **DIN EN ISO/IEC 17025:2018**. All analyses have been carried out with greatest care and on the basis of state of the art scientific knowledge. The results refer solely to the analysed samples, as received. The duplication and publication also in parts requires a written authorization by this laboratory. Our General Terms and Conditions apply exclusively and are available under [eurofinsgenomics.com](http://eurofinsgenomics.com)

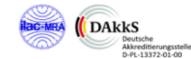

This report was created automatically and is therefore valid without a signature.

**Eurofins Genomics Europe  
Food/Environment/White Biotech  
Products & Services GmbH**  
Anzinger Straße 7 a  
85560 Ebersberg  
Germany

Tel.: +49 7531 816068  
Fax: +49 8092 21084

Email: support-  
eu@genomics.eurofinseu.com  
Web: eurofinsgenomics.com

Managing Directors: Dr. Mashal Alawi  
& Dr. Sonja Wiedemann

Register Court Munich HRB 207710  
VAT ID: DE815473648

HypoVereinsbank

IBAN: DE23 2073 0017 7000 0006 50  
SWIFT: HYVEDEMM17
